# Supplementary material
Source: publisher figshare collection journal article supplement (https://acs.figshare.com/ndownloader/files/9493066)
Supplement: Supplementary file 1 [file 9493066]

## Sheet: protFDR_results_annot_disc_miss
Supporting Information Table 5: Missing proteins identified with PSM, peptide and protein FDR < 1% and one or more unique peptides (after using neXtProt uniqueness checker tool).
Column Name	Explanation
GeneName	Gene Name
NextprotID	Nextprot ID
sample	Sample where the missing protein was found
search_engine	Search engine that was used to find the missing protein
PeptideSeq	Unique peptide sequence identified
Chr	Chr of the missing protein
NOfUniquePeptides	Number of unique peptides identified of the missing protein
joint FDR	FDR value for all the experiments of NCI60 together of a search engine analysis
SRMAtlas	Natural or synthetic SRM transitions for unique peptides (other than the NCI60 observed one) of the protein in SRM atlas
PepAtlas	Previously reported unique peptides (other than the NCI60 observed one) for each missing protein in PeptideAtlas
GeneName	NextprotID	sample	search_engine	PeptideSeq	Chr	NOfUniquePeptides	jointFDR	SRMAtlas	PepAtlas
TLDC2	NX_A0PJX2	COLON_COLO205_P003811_DP	mascot	DGFSLQSLYR	20	2	0.0200453	1	0
TLDC2	NX_A0PJX2	COLON_COLO205_P003811_DP	mascot	GGSSPCPTFNNEVLAR	20	2	0.0200453	1	0
LAMB4	NX_A4D0S4	CNS_SF268_P003376_PP	mascot	LAGDTEAKIR	7	2	0.0332484	1	0
LAMB4	NX_A4D0S4	CNS_SF268_P003376_PP	mascot	LNEEADGAQKLLVK	7	2	0.0332484	1	0
FREM3	NX_P0C091	NSCLC_H23_P003198_PP	mascot	IFITDVDNK	4	2	0.0489738	1	0
FREM3	NX_P0C091	NSCLC_H23_P003198_PP	mascot	LVDAVGAPLPR	4	2	0.0489738	1	0
MYEOV	NX_Q96EZ4	BREAST_MCF7_P003818_DP	omssa	GVSFLTFHLHQSVPLGDR	11	2	0	1	0
MYEOV	NX_Q96EZ4	BREAST_MCF7_P003818_DP	omssa	VAGSWLTVVTVEALGGWR	11	2	0	1	0
RAD21L1	NX_Q9H4I0	LEUK_CCRFCEM_P003819_DP	omssa	IWLAAHWEKK	20	2	0	1	0
RAD21L1	NX_Q9H4I0	LEUK_CCRFCEM_P003819_DP	omssa	MLFTKCFLSSGFK	20	2	0	1	0
CCDC144A	NX_A2RUR9	CNS_SF295_P003360_PP	omssa	NNLDLVVQER	17	1	0	1	0
ZNF804B	NX_A4D1E1	CNS_SNB19_P001899_PP	omssa	YNLDYSDSEPNKSEYTFSANDLEMK	7	1	0.0498887	1	0
ZNF804B	NX_A4D1E1	MELAN_UACC257_P001897_PP	omssa	YNLDYSDSEPNKSEYTFSANDLEMK	7	1	0.0498887	1	0
FAM149A	NX_A5PLN7	BREAST_MDAMB435_P001387_PP	mascot	LGLPPVSPR	4	1	0.0500217	1	1
FAM149A	NX_A5PLN7	LEUK_SR_P001750_PP	mascot	LGLPPVSPR	4	1	0.0500217	1	1
ANKRD62	NX_A6NC57	BREAST_HS578T_P001355_PP	comet	INLEDEAQSLK	18	1	0.0515959	1	0
ANKRD62	NX_A6NC57	BREAST_MDAMB435_P001387_PP	comet	INLEDEAQSLK	18	1	0.0515959	1	0
VWA3A	NX_A6NCI4	CNS_SNB75_P001561_PP	omssa	LWVKTLQPDGGSNLLQALK	16	1	0.00100794	1	0
VWA3A	NX_A6NCI4	MELAN_LOXIMVI_P001390_PP	mascot	RTSSSIDLPR	16	1	0.0555255	1	0
VWA3A	NX_A6NCI4	RENAL_ACHN_P003207_PP	omssa	LWVKTLQPDGGSNLLQALK	16	1	0.00100794	1	0
MROH2A	NX_A6NES4	MELAN_SKMEL2_P001749_PP	omssa	IFFDNESELLRLK	2	1	0	1	0
MROH2A	NX_A6NES4	NSCLC_H226_P001566_PP	omssa	YFVTVWLRHYNPEVK	2	1	0	1	0
SERINC4	NX_A6NH21	COLON_COLO205_P003811_DP	comet	AGPSPGTSLGLAQQHSGGSSVLVK	15	1	0.0888183	1	1
SERINC4	NX_A6NH21	OVAR_SKOV3_P003816_DP	omssa	AGPSPGTSLGLAQQHSGGSSVLVK	15	1	0.00279099	1	1
DDTL	NX_A6NHG4	PROSTATE_DU145_P001745_PP	mascot	FPTVLSTSPAAHGGPR	22	1	0	1	0
-	NX_A6NIZ1	CNS_SNB75_P001561_PP	comet	EQVEVDAQQCMLEILDTAGTEQFTAMR	5	1	0	0	1
-	NX_A6NIZ1	PROSTATE_PC3_P003487_PP	comet	EQVEVDAQQCMLEILDTAGTEQFTAMR	5	1	0	0	1
-	NX_A6NIZ1	RENAL_ACHN_P003207_PP	comet	EQVEVDAQQCMLEILDTAGTEQFTAMR	5	1	0	0	1
ASB14	NX_A6NK59	OVAR_OVCAR5_P003363_PP	tandem	CFDCPHGDKVHPSYTVEGWTSTVIK	3	1	0.0541641	1	0
-	NX_A6NLC8	CNS_U251_P001569_PP	mascot	ACIAGLMRSITGR	5	1	0.0331596	1	0
-	NX_A6NLC8	RENAL_A498_P003196_PP	mascot	ACIAGLMRSITGR	5	1	0.0331596	1	0
TCEB3CL2	NX_A6NLF2	RENAL_SN12C_P0001751_PP	mascot	LQAAVADSAGPK	18	1	0.0539693	0	0
LRRC53	NX_A6NM62	LEUK_SR_P001388_PP	mascot	EQNSSHAQLENK	1	1	0.043735	1	0
LRRC53	NX_A6NM62	MELAN_SKMEL5_P001570_PP	mascot	EQNSSHAQLENK	1	1	0.043735	1	0
CCDC169	NX_A6NNP5	PROSTATE_DU145_P001745_PP	comet	TRYETQLELNDELEK	13	1	0.00941828	1	0
RNF212B	NX_A8MTL3	LEUK_CCRFCEM_P003819_DP	omssa	DSYNETPSPASTHSLSYR	14	1	0.0131089	1	0
HMSD	NX_A8MTL9	LEUK_MOLT4_P003361_PP	comet	MSISSALAMVFMGAKGNTAAQMSQALCFSK	18	1	0.026707	1	0
ARHGEF33	NX_A8MVX0	MELAN_MALME3M_P003199_PP	tandem	KSQQQQSLMESMQPGKPSDWELEGR	2	1	0.046171	1	0
FER1L4	NX_A9Z1Z3	PROSTATE_DU145_P001745_PP	omssa	AGRLEEQLGR	20	1	0.00228983	1	0
FER1L4	NX_A9Z1Z3	RENAL_SN12C_P0001751_PP	omssa	AGRLEEQLGR	20	1	0.00228983	1	0
PRR32	NX_B1ATL7	RENAL_ACHN_P003207_PP	tandem	QEGQDAINVSWEVSGGPPALIVGGTK	X	1	0.0573115	1	0
TARM1	NX_B6A8C7	CNS_U251_P003815_DP	omssa	LGLAAVIVVIMGAFLVEAWYSR	19	1	0.0171344	1	0
ZNF878	NX_C9JN71	NSCLC_A549_P001906_PP	mascot	AFSFVKDLR	19	1	0.0348336	0	0
ZNF878	NX_C9JN71	RENAL_7860_P001903_PP	mascot	AFSFVKDLR	19	1	0.0348336	0	0
ZNF878	NX_C9JN71	RENAL_UO31_P003201_PP	mascot	AFSFVKDLR	19	1	0.0348336	0	0
C11orf94	NX_C9JXX5	NSCLC_H226_P001566_PP	omssa	MVLAMLGALHPR	11	1	0	1	0
UBAP1L	NX_F5GYI3	CNS_SF295_P003360_PP	mascot	MNALDGVPFKLPK	15	1	0.0500163	1	1
UBAP1L	NX_F5GYI3	COLON_KM12_P003820_PP	mascot	MNALDGVPFKLPK	15	1	0.0500163	1	1
UBAP1L	NX_F5GYI3	OVAR_OVCAR3_P001747_PP	mascot	MNALDGVPFKLPK	15	1	0.0500163	1	1
SLC16A5	NX_O15375	OVAR_OVCAR5_P003363_PP	mascot	QAVAADALER	17	1	0.0172178	1	1
TEX28P2,TEX28P1,TEX28	NX_O15482	PROSTATE_PC3_P003487_PP	mascot	SLTDLQLLLESLQEEK	X	1	0.0441385	1	1
GUCY1B2	NX_O75343	BREAST_BT549_P001357_PP	omssa	DQEALQAAFLKMK	13	1	0.0273279	1	0
GUCY1B2	NX_O75343	BREAST_MDAMB435_P001387_PP	omssa	DQEALQAAFLKMK	13	1	0.0273279	1	0
GUCY1B2	NX_O75343	COLON_SW620_P001905_PP	omssa	DQEALQAAFLKMK	13	1	0.0273279	1	0
GUCY1B2	NX_O75343	NSCLC_H460_P003381_PP	omssa	DQEALQAAFLKMK	13	1	0.0273279	1	0
GUCY1B2	NX_O75343	OVAR_IGROV1_P001748_PP	omssa	DQEALQAAFLKMK	13	1	0.0273279	1	0
OR10J4	NX_P0C629	BREAST_BT549_P001357_PP	mascot	DALLRALGR	1	1	0.0155856	1	0
OR10J4	NX_P0C629	BREAST_MCF7_P003362_PP	mascot	DALLRALGR	1	1	0.0155856	1	0
OR10J4	NX_P0C629	CNS_SF295_P003360_PP	mascot	DALLRALGR	1	1	0.0155856	1	0
OR10J4	NX_P0C629	CNS_SF539_P003358_PP	mascot	DALLRALGR	1	1	0.0155856	1	0
OR10J4	NX_P0C629	CNS_SNB75_P001561_PP	mascot	DALLRALGR	1	1	0.0155856	1	0
OR10J4	NX_P0C629	CNS_U251_P001569_PP	mascot	DALLRALGR	1	1	0.0155856	1	0
OR10J4	NX_P0C629	COLON_HT29_P001565_PP	mascot	DALLRALGR	1	1	0.0155856	1	0
OR10J4	NX_P0C629	COLON_KM12_P003820_PP	mascot	DALLRALGR	1	1	0.0155856	1	0
OR10J4	NX_P0C629	LEUK_CCRFCEM_P003197_PP	mascot	DALLRALGR	1	1	0.0155856	1	0
OR10J4	NX_P0C629	LEUK_MOLT4_P003361_PP	mascot	DALLRALGR	1	1	0.0155856	1	0
OR10J4	NX_P0C629	LEUK_SR_P001750_PP	mascot	DALLRALGR	1	1	0.0155856	1	0
OR10J4	NX_P0C629	MELAN_M14_P001562_PP	mascot	DALLRALGR	1	1	0.0155856	1	0
OR10J4	NX_P0C629	MELAN_MALME3M_P003199_PP	mascot	DALLRALGR	1	1	0.0155856	1	0
OR10J4	NX_P0C629	MELAN_MALME3M_P003199_PP	omssa	DALLRALGR	1	1	0	1	0
OR10J4	NX_P0C629	MELAN_UACC257_P001897_PP	mascot	DALLRALGR	1	1	0.0155856	1	0
OR10J4	NX_P0C629	NSCLC_A549_P001906_PP	mascot	DALLRALGR	1	1	0.0155856	1	0
OR10J4	NX_P0C629	NSCLC_H226_P001566_PP	mascot	DALLRALGR	1	1	0.0155856	1	0
OR10J4	NX_P0C629	NSCLC_H460_P003381_PP	mascot	DALLRALGR	1	1	0.0155856	1	0
OR10J4	NX_P0C629	OVAR_OVCAR8_P003383_PP	mascot	DALLRALGR	1	1	0.0155856	1	0
OR10J4	NX_P0C629	PROSTATE_DU145_P001745_PP	mascot	DALLRALGR	1	1	0.0155856	1	0
OR10J4	NX_P0C629	PROSTATE_PC3_P003487_PP	mascot	DALLRALGR	1	1	0.0155856	1	0
OR10J4	NX_P0C629	RENAL_CAKI1_P003357_PP	mascot	DALLRALGR	1	1	0.0155856	1	0
OR10J4	NX_P0C629	RENAL_UO31_P003201_PP	mascot	DALLRALGR	1	1	0.0155856	1	0
PPIAL4G	NX_P0DN37	RENAL_TK10_P003203_PP	comet	MVNSVIFFDITVDGKPLGRISIK	1	1	0.0272408	0	1
ADORA2B	NX_P29275	CNS_SF295_P003360_PP	omssa	TELMDHSRTTLQR	17	1	0	1	0
ADORA2B	NX_P29275	MELAN_SKMEL2_P001749_PP	omssa	TELMDHSRTTLQR	17	1	0	1	0
HTR1F	NX_P30939	NSCLC_EKVX_P001358_PP	comet	ILVSLTLSGLALMTTTINSLVIAAIIVTRK	3	1	0.00562041	1	0
ZNF75D	NX_P51815	BREAST_MCF7ADR_P001564_PP	tandem	EAVLLGGTAVAPGFKWKPAEPQPMGVFQK	X	1	0.0822957	1	0
LINC01547	NX_P58512	RENAL_RXF393_P001567_PP	tandem	DLRPAHQDRSGTR	21	1	0.0431153	1	0
KIAA1024L	NX_P59773	BREAST_MCF7ADR_P001564_PP	tandem	MGLILLVVISILVTIVTIITFFT	5	1	0.0673981	1	0
BPIFB3	NX_P59826	BREAST_BT549_P001357_PP	mascot	SVAGDIIDFPK	20	1	0.0152628	1	0
BPIFB3	NX_P59826	CNS_SF295_P003360_PP	mascot	SVAGDIIDFPK	20	1	0.0152628	1	0
BPIFB3	NX_P59826	CNS_SF539_P003358_PP	mascot	SVAGDIIDFPK	20	1	0.0152628	1	0
BPIFB3	NX_P59826	CNS_SNB19_P001899_PP	mascot	SVAGDIIDFPK	20	1	0.0152628	1	0
BPIFB3	NX_P59826	CNS_U251_P001569_PP	mascot	SVAGDIIDFPK	20	1	0.0152628	1	0
BPIFB3	NX_P59826	MELAN_MALME3M_P003199_PP	mascot	SVAGDIIDFPK	20	1	0.0152628	1	0
BPIFB3	NX_P59826	MELAN_SKMEL5_P001570_PP	mascot	SVAGDIIDFPK	20	1	0.0152628	1	0
BPIFB3	NX_P59826	NSCLC_A549_P001906_PP	mascot	SVAGDIIDFPK	20	1	0.0152628	1	0
BPIFB3	NX_P59826	NSCLC_H226_P001566_PP	mascot	SVAGDIIDFPK	20	1	0.0152628	1	0
BPIFB3	NX_P59826	OVAR_SKOV3_P001744_PP	mascot	SVAGDIIDFPK	20	1	0.0152628	1	0
BPIFB3	NX_P59826	RENAL_ACHN_P003207_PP	mascot	SVAGDIIDFPK	20	1	0.0152628	1	0
BPIFB3	NX_P59826	RENAL_TK10_P003203_PP	mascot	SVAGDIIDFPK	20	1	0.0152628	1	0
GABRE	NX_P78334	RENAL_SN12C_P0001751_PP	tandem	MLSKVLPVLLGILLILQSR	X	1	0.0707338	1	0
NKX3-2	NX_P78367	MELAN_M14_P003817_DP	omssa	RQMAADLLASAPAAK	4	1	0	1	0
SIM1	NX_P81133	LEUK_HL60_P001904_PP	omssa	EKENSEFYELAK	6	1	0	1	0
SIM1	NX_P81133	RENAL_ACHN_P003207_PP	omssa	EKENSEFYELAK	6	1	0	1	0
OC90	NX_Q02509	COLON_HT29_P001565_PP	tandem	FEMEGLPVDESDSCCFQHR	8	1	0.0758769	1	0
SLC17A1	NX_Q14916	LEUK_CCRFCEM_P003819_DP	omssa	AVQGAAQGIVATAQFEIYVK	6	1	0	1	1
CNGA2	NX_Q16280	LEUK_CCRFCEM_P003197_PP	omssa	IVRLVGIIR	X	1	0	1	0
CNGA2	NX_Q16280	NSCLC_H23_P003198_PP	omssa	IVRLVGIIR	X	1	0	1	0
CNGA2	NX_Q16280	NSCLC_HOP92_P003204_PP	omssa	IVRLVGIIR	X	1	0	1	0
TIGD6	NX_Q17RP2	CNS_SF295_P003360_PP	mascot	LMNGLGIDK	5	1	0.0600258	1	0
KIF4B	NX_Q2VIQ3	BREAST_MCF7ADR_P001564_PP	comet	KMTQNDNQLQPIQFQYQDNIK	5	1	0	1	1
KIF4B	NX_Q2VIQ3	CNS_SF268_P003376_PP	comet	KMTQNDNQLQPIQFQYQDNIK	5	1	0	1	1
KIF4B	NX_Q2VIQ3	CNS_SF539_P003358_PP	comet	KMTQNDNQLQPIQFQYQDNIK	5	1	0	1	1
KIF4B	NX_Q2VIQ3	CNS_SNB75_P001561_PP	comet	KMTQNDNQLQPIQFQYQDNIK	5	1	0	1	1
KIF4B	NX_Q2VIQ3	CNS_U251_P001569_PP	comet	KMTQNDNQLQPIQFQYQDNIK	5	1	0	1	1
KIF4B	NX_Q2VIQ3	COLON_HT29_P001565_PP	comet	KMTQNDNQLQPIQFQYQDNIK	5	1	0	1	1
KIF4B	NX_Q2VIQ3	LEUK_K562_P001356_PP	tandem	QIESLETEMELRSAQIADLQQK	5	1	0	1	1
KIF4B	NX_Q2VIQ3	LEUK_RPMI8226_P003359_PP	comet	KMTQNDNQLQPIQFQYQDNIK	5	1	0	1	1
KIF4B	NX_Q2VIQ3	LEUK_SR_P001750_PP	comet	KMTQNDNQLQPIQFQYQDNIK	5	1	0	1	1
KIF4B	NX_Q2VIQ3	MELAN_M14_P001562_PP	comet	KMTQNDNQLQPIQFQYQDNIK	5	1	0	1	1
KIF4B	NX_Q2VIQ3	MELAN_MALME3M_P003199_PP	comet	KMTQNDNQLQPIQFQYQDNIK	5	1	0	1	1
KIF4B	NX_Q2VIQ3	NSCLC_EKVX_P001358_PP	comet	KMTQNDNQLQPIQFQYQDNIK	5	1	0	1	1
KIF4B	NX_Q2VIQ3	NSCLC_H460_P003381_PP	comet	KMTQNDNQLQPIQFQYQDNIK	5	1	0	1	1
KIF4B	NX_Q2VIQ3	OVAR_IGROV1_P001748_PP	comet	KMTQNDNQLQPIQFQYQDNIK	5	1	0	1	1
KIF4B	NX_Q2VIQ3	OVAR_OVCAR8_P003383_PP	comet	KMTQNDNQLQPIQFQYQDNIK	5	1	0	1	1
KIF4B	NX_Q2VIQ3	PROSTATE_PC3_P003487_PP	comet	KMTQNDNQLQPIQFQYQDNIK	5	1	0	1	1
KIF4B	NX_Q2VIQ3	RENAL_SN12C_P0001751_PP	comet	KMTQNDNQLQPIQFQYQDNIK	5	1	0	1	1
TRIM16L	NX_Q309B1	BREAST_MCF7_P003818_DP	comet	EQFLQYVHDITFDPDTAHK	17	1	0	1	1
ANO4	NX_Q32M45	COLON_HT29_P001565_PP	comet	YLIQEMMYEAELERLQK	12	1	0.0734274	1	1
SMIM21	NX_Q3B7S5	LEUK_CCRFCEM_P003819_DP	omssa	FFTLLVLFHVMVLLRNHSR	18	1	0.00051753	1	0
PROX2	NX_Q3B8N5	LEUK_SR_P001388_PP	tandem	QAISDGVTNPKMLVVLR	14	1	0.104186	1	0
PROX2	NX_Q3B8N5	MELAN_SKMEL2_P001749_PP	omssa	LMFFFTRYPSSNLLK	14	1	0	1	0
NBPF1	NX_Q3BBV0	COLON_HT29_P001565_PP	omssa	CFVTQLAGFLANQQNK	1	1	0	1	0
OTOGL	NX_Q3ZCN5	PROSTATE_PC3_P003813_DP	omssa	EAEVVMGIIDK	12	1	0.00821867	1	0
KBTBD12	NX_Q3ZCT8	COLON_KM12_P003820_PP	comet	IQNMKELAEMIDVVLTAEGEK	3	1	0.0788391	1	1
GALNTL6	NX_Q49A17	MELAN_UACC257_P001897_PP	tandem	VAETWMDEFAEYIYQRRPEYR	4	1	0.0314123	1	0
C14orf28	NX_Q4W4Y0	COLON_HT29_P001565_PP	comet	ELSLHFGREFVDCFLYLMDTYSFTTVK	14	1	0.0183665	1	0
ZNF585B	NX_Q52M93	LEUK_MOLT4_P003361_PP	comet	MPASWTSPQKSSALAPEDHGSSYEGSVSFR	19	1	0.0160222	1	0
MAP3K19	NX_Q56UN5	PROSTATE_PC3_P003813_DP	tandem	MAAMFYIGAHRGLMPPLPDHFSENAADFVR	2	1	0.128166	1	0
ANKRD20A8P	NX_Q5CZ79	BREAST_MCF7_P003818_DP	omssa	SLALETVQNDLR	2	1	0.00251836	1	0
ANKRD20A8P	NX_Q5CZ79	MELAN_M14_P003817_DP	omssa	SLALETVQNDLR	2	1	0.00251836	1	0
ANKRD20A8P	NX_Q5CZ79	NSCLC_H460_P003814_DP	omssa	SLALETVQNDLR	2	1	0.00251836	1	0
METTL24	NX_Q5JXM2	PROSTATE_PC3_P003487_PP	omssa	SAHILESQHLWYHRLSIDWR	6	1	0.00405619	1	0
SLC10A5	NX_Q5PT55	CNS_SF268_P003376_PP	omssa	LIEEIKNVK	8	1	0	1	0
SLC10A5	NX_Q5PT55	RENAL_RXF393_P003812_DP	omssa	LIEEIKNVK	8	1	0	1	0
KIAA2022	NX_Q5QGS0	BREAST_MCF7ADR_P001564_PP	mascot	SNGKTAIGDPGR	X	1	0.0558973	1	1
PRR31	NX_Q5SQ13	CNS_SF539_P003358_PP	mascot	MLGTQWTLAR	9	1	0.0249326	1	0
ZNF648	NX_Q5T619	MELAN_SKMEL2_P001749_PP	mascot	MAQVDSQDR	1	1	0.0531731	1	1
ZNF658	NX_Q5TYW1	BREAST_MCF7_P003818_DP	comet	DVMLENYSHLISVGYCITKPK	9	1	0.0749914	1	1
TCERG1L	NX_Q5VWI1	RENAL_CAKI1_P003357_PP	mascot	IIEDPPHKR	10	1	0.00323343	1	0
C9orf131	NX_Q5VYM1	MELAN_LOXIMVI_P001390_PP	comet	MEWLLEDLLGAKGDMGLLWGQLTHALACR	9	1	0.0205188	1	0
LIPM	NX_Q5VYY2	MELAN_MALME3M_P003199_PP	tandem	IYYVGYSQGTTMGFIAFSTMPELAQK	10	1	0.0615178	1	0
NUGGC	NX_Q68CJ6	BREAST_BT549_P001357_PP	mascot	FAEEKVELLEK	8	1	0.0333296	1	0
NUGGC	NX_Q68CJ6	BREAST_MCF7ADR_P001564_PP	mascot	FAEEKVELLEK	8	1	0.0333296	1	0
NUGGC	NX_Q68CJ6	CNS_SF268_P003376_PP	mascot	FAEEKVELLEK	8	1	0.0333296	1	0
NUGGC	NX_Q68CJ6	CNS_U251_P001569_PP	mascot	FAEEKVELLEK	8	1	0.0333296	1	0
NUGGC	NX_Q68CJ6	COLON_HCC2998_P0001568_PP	mascot	FAEEKVELLEK	8	1	0.0333296	1	0
NUGGC	NX_Q68CJ6	COLON_HT29_P001565_PP	mascot	FAEEKVELLEK	8	1	0.0333296	1	0
NUGGC	NX_Q68CJ6	MELAN_MALME3M_P003199_PP	mascot	FAEEKVELLEK	8	1	0.0333296	1	0
NUGGC	NX_Q68CJ6	MELAN_SKMEL5_P001570_PP	mascot	FAEEKVELLEK	8	1	0.0333296	1	0
NUGGC	NX_Q68CJ6	NSCLC_EKVX_P001358_PP	mascot	FAEEKVELLEK	8	1	0.0333296	1	0
NUGGC	NX_Q68CJ6	NSCLC_H23_P003198_PP	mascot	FAEEKVELLEK	8	1	0.0333296	1	0
NUGGC	NX_Q68CJ6	OVAR_SKOV3_P001744_PP	mascot	FAEEKVELLEK	8	1	0.0333296	1	0
NUGGC	NX_Q68CJ6	PROSTATE_PC3_P003487_PP	mascot	FAEEKVELLEK	8	1	0.0333296	1	0
NUGGC	NX_Q68CJ6	RENAL_7860_P001903_PP	mascot	FAEEKVELLEK	8	1	0.0333296	1	0
OVOS2	NX_Q6IE36	BREAST_HS578T_P001355_PP	comet	GATLNLEERR	12	1	0.0782698	1	0
OVOS2	NX_Q6IE36	LEUK_SR_P001388_PP	omssa	GATLNLEERR	12	1	0	1	0
OVOS2	NX_Q6IE36	MELAN_MALME3M_P003199_PP	omssa	GATLNLEERR	12	1	0	1	0
OVOS2	NX_Q6IE36	MELAN_SKMEL2_P001749_PP	omssa	GATLNLEERR	12	1	0	1	0
C11orf63	NX_Q6NUN7	OVAR_SKOV3_P003816_DP	omssa	VESESQLSSERSQR	11	1	0.00040541	1	1
EBLN2	NX_Q6P2I7	BREAST_MCF7_P003362_PP	mascot	SFRPMILNK	3	1	0.0684975	1	0
EBLN2	NX_Q6P2I7	CNS_SF268_P003376_PP	mascot	SFRPMILNK	3	1	0.0684975	1	0
ZNF880	NX_Q6PDB4	COLON_COLO205_P003811_DP	omssa	IYSSVKSHILNK	19	1	0	1	0
SLC25A34	NX_Q6PIV7	MELAN_M14_P003817_DP	omssa	TRLQLQGELQAR	1	1	0.00864845	1	0
DHRS4L2	NX_Q6PKH6	MELAN_M14_P003817_DP	mascot	LLGLCAWARK	14	1	0	1	1
DHRS4L2	NX_Q6PKH6	PROSTATE_PC3_P003813_DP	mascot	LLGLCAWARK	14	1	0	1	1
KLHL17	NX_Q6TDP4	OVAR_OVCAR3_P001747_PP	tandem	VVLASCSPYFHAMFTNEMSESR	1	1	0.122799	1	1
WBSCR28	NX_Q6UE05	BREAST_BT549_P001357_PP	mascot	ALQVNCVVR	7	1	0.00721125	1	1
WBSCR28	NX_Q6UE05	CNS_SF295_P003360_PP	mascot	ALQVNCVVR	7	1	0.00721125	1	1
WBSCR28	NX_Q6UE05	CNS_SNB19_P001899_PP	mascot	ALQVNCVVR	7	1	0.00721125	1	1
WBSCR28	NX_Q6UE05	COLON_KM12_P003820_PP	mascot	ALQVNCVVR	7	1	0.00721125	1	1
WBSCR28	NX_Q6UE05	COLON_SW620_P001905_PP	mascot	ALQVNCVVR	7	1	0.00721125	1	1
WBSCR28	NX_Q6UE05	LEUK_K562_P001356_PP	mascot	ALQVNCVVR	7	1	0.00721125	1	1
WBSCR28	NX_Q6UE05	MELAN_MALME3M_P003199_PP	mascot	ALQVNCVVR	7	1	0.00721125	1	1
WBSCR28	NX_Q6UE05	MELAN_SKMEL28_P001360_PP	mascot	ALQVNCVVR	7	1	0.00721125	1	1
WBSCR28	NX_Q6UE05	MELAN_SKMEL2_P001749_PP	mascot	ALQVNCVVR	7	1	0.00721125	1	1
WBSCR28	NX_Q6UE05	NSCLC_H226_P001566_PP	mascot	ALQVNCVVR	7	1	0.00721125	1	1
WBSCR28	NX_Q6UE05	NSCLC_H460_P003381_PP	mascot	ALQVNCVVR	7	1	0.00721125	1	1
WBSCR28	NX_Q6UE05	OVAR_OVCAR3_P001747_PP	mascot	ALQVNCVVR	7	1	0.00721125	1	1
WBSCR28	NX_Q6UE05	OVAR_OVCAR5_P003363_PP	mascot	ALQVNCVVR	7	1	0.00721125	1	1
TEX261	NX_Q6UWH6	COLON_COLO205_P001892_PP	mascot	LGILVVFSFIK	2	1	0.00172872	0	1
TEX261	NX_Q6UWH6	COLON_COLO205_P001892_PP	omssa	LGILVVFSFIK	2	1	0.0213885	0	1
TEX261	NX_Q6UWH6	COLON_COLO205_P001892_PP	tandem	LGILVVFSFIK	2	1	0.0517412	0	1
TEX261	NX_Q6UWH6	LEUK_SR_P001388_PP	omssa	LGILVVFSFIK	2	1	0.0213885	0	1
TEX261	NX_Q6UWH6	RENAL_A498_P003196_PP	mascot	LGILVVFSFIK	2	1	0.00172872	0	1
TEX261	NX_Q6UWH6	RENAL_A498_P003196_PP	omssa	LGILVVFSFIK	2	1	0.0213885	0	1
CASP12	NX_Q6UXS9	BREAST_HS578T_P001355_PP	comet	AGADTHGRLLQGNICNDAVTK	11	1	0.0126993	1	0
CASP12	NX_Q6UXS9	CNS_SF295_P003360_PP	comet	AGADTHGRLLQGNICNDAVTK	11	1	0.0126993	1	0
CASP12	NX_Q6UXS9	COLON_COLO205_P001892_PP	comet	AGADTHGRLLQGNICNDAVTK	11	1	0.0126993	1	0
CASP12	NX_Q6UXS9	MELAN_SKMEL5_P001570_PP	comet	AGADTHGRLLQGNICNDAVTK	11	1	0.0126993	1	0
CASP12	NX_Q6UXS9	NSCLC_EKVX_P001358_PP	omssa	AGADTHGRLLQGNICNDAVTK	11	1	0.00872841	1	0
CASP12	NX_Q6UXS9	NSCLC_H226_P001566_PP	omssa	AGADTHGRLLQGNICNDAVTK	11	1	0.00872841	1	0
CASP12	NX_Q6UXS9	OVAR_OVCAR3_P001747_PP	comet	AGADTHGRLLQGNICNDAVTK	11	1	0.0126993	1	0
CASP12	NX_Q6UXS9	OVAR_OVCAR4_P001888_PP	comet	AGADTHGRLLQGNICNDAVTK	11	1	0.0126993	1	0
CASP12	NX_Q6UXS9	OVAR_OVCAR8_P003383_PP	comet	AGADTHGRLLQGNICNDAVTK	11	1	0.0126993	1	0
CASP12	NX_Q6UXS9	RENAL_7860_P001903_PP	comet	AGADTHGRLLQGNICNDAVTK	11	1	0.0126993	1	0
CASP12	NX_Q6UXS9	RENAL_7860_P001903_PP	omssa	AGADTHGRLLQGNICNDAVTK	11	1	0.00872841	1	0
LEKR1	NX_Q6ZMV7	BREAST_MCF7_P003818_DP	omssa	SIEQLQETLR	3	1	0	1	0
LEKR1	NX_Q6ZMV7	CNS_U251_P003815_DP	omssa	SIEQLQETLR	3	1	0	1	0
LEKR1	NX_Q6ZMV7	OVAR_SKOV3_P003816_DP	omssa	SIEQLQETLR	3	1	0	1	0
ZCCHC16	NX_Q6ZR62	LEUK_SR_P001750_PP	comet	LFFDYLSQQLESCGIISGPDKSTLLK	X	1	0.0721745	1	0
RNF44	NX_Q7L0R7	COLON_HCT15_P003208_PP	comet	MPLQRLDNDVDLR	5	1	0.0817023	1	0
TCF24	NX_Q7RTU0	OVAR_OVCAR8_P003383_PP	tandem	MDRGRPAGSPLSASAEPAPLAAAIR	8	1	0.0690568	1	0
ZNF720	NX_Q7Z2F6	LEUK_CCRFCEM_P003819_DP	mascot	KLIEASFQK	16	1	0.0419864	1	0
ZNF720	NX_Q7Z2F6	NSCLC_H460_P003814_DP	mascot	KLIEASFQK	16	1	0.0419864	1	0
ZNF720	NX_Q7Z2F6	PROSTATE_PC3_P003813_DP	mascot	KLIEASFQK	16	1	0.0419864	1	0
GVINP1	NX_Q7Z2Y8	PROSTATE_PC3_P003813_DP	omssa	IAGDMRATCPAFNGNR	11	1	0.00129245	1	1
GVINP1	NX_Q7Z2Y8	RENAL_RXF393_P003812_DP	omssa	IAGDMRATCPAFNGNR	11	1	0.00129245	1	1
TMC3	NX_Q7Z5M5	COLON_COLO205_P001892_PP	comet	IETVAQSMPQSPRPGDRAPSSPLPGVPK	15	1	0.0433621	1	1
TMEM144	NX_Q7Z5S9	COLON_HT29_P001565_PP	comet	MSNNGADLTFGYISCFVAILLFGSNFVPLK	4	1	0.0651435	1	0
ZNF546	NX_Q86UE3	BREAST_BT549_P001357_PP	omssa	AFRQQSYLIQHLR	19	1	0	1	1
ZNF546	NX_Q86UE3	CNS_SF295_P003360_PP	omssa	AFRQQSYLIQHLR	19	1	0	1	1
ZNF546	NX_Q86UE3	LEUK_SR_P001388_PP	omssa	AFRQQSYLIQHLR	19	1	0	1	1
ZNF546	NX_Q86UE3	NSCLC_H522_P0001563_PP	omssa	AFRQQSYLIQHLR	19	1	0	1	1
ZNF546	NX_Q86UE3	OVAR_IGROV1_P001748_PP	omssa	AFRQQSYLIQHLR	19	1	0	1	1
ZNF546	NX_Q86UE3	RENAL_CAKI1_P003357_PP	omssa	AFRQQSYLIQHLR	19	1	0	1	1
ZNF546	NX_Q86UE3	RENAL_SN12C_P0001751_PP	omssa	AFRQQSYLIQHLR	19	1	0	1	1
RANBP3L	NX_Q86VV4	RENAL_A498_P003196_PP	tandem	CLLEKIDVITGEETEHNVLK	5	1	0.0360372	1	1
NLRP8	NX_Q86W28	LEUK_CCRFCEM_P003819_DP	omssa	VVLRIGNNK	19	1	0	1	0
NLRP8	NX_Q86W28	MELAN_M14_P003817_DP	omssa	VVLRIGNNK	19	1	0	1	0
SGPP2	NX_Q8IWX5	OVAR_SKOV3_P003816_DP	mascot	SLQDSQLVAR	2	1	0.00334863	1	0
SGPP2	NX_Q8IWX5	OVAR_SKOV3_P003816_DP	omssa	SLQDSQLVAR	2	1	0.00910996	1	0
C20orf196	NX_Q8IYI0	NSCLC_H23_P003198_PP	comet	MAARDATSGSLSEESSALDLPSACDIR	20	1	0.0311682	1	0
KATNAL2	NX_Q8IYT4	MELAN_SKMEL2_P001749_PP	omssa	LVCREAAMRPVR	18	1	0	1	1
H1FOO	NX_Q8IZA3	RENAL_A498_P003196_PP	mascot	KMAPATAPR	3	1	0.00439614	1	1
H1FOO	NX_Q8IZA3	RENAL_SN12C_P0001751_PP	mascot	KMAPATAPR	3	1	0.00439614	1	1
TDH	NX_Q8IZJ6	MELAN_LOXIMVI_P001390_PP	tandem	VLITGALGQLGVGLANLLRK	8	1	0.0187946	1	0
TDH	NX_Q8IZJ6	NSCLC_H522_P0001563_PP	tandem	VLITGALGQLGVGLANLLRK	8	1	0.0187946	1	0
TDH	NX_Q8IZJ6	OVAR_SKOV3_P001744_PP	tandem	VLITGALGQLGVGLANLLRK	8	1	0.0187946	1	0
CACTIN-AS1	NX_Q8N1I8	LEUK_SR_P001750_PP	tandem	GALVDEVGVEDVELVSLHDLGRWVVK	19	1	0.120879	1	0
STPG2	NX_Q8N412	CNS_SF295_P003360_PP	comet	SVDVPSIPSCGKSYGYHINDDGSIIK	4	1	0.0858676	1	0
RPRML	NX_Q8N4K4	CNS_SF268_P003376_PP	comet	MNATFLNHSGLEEVDGVGGGAGAALGNR	17	1	0.0294963	1	0
TMEM251	NX_Q8N6I4	NSCLC_H460_P003381_PP	comet	LALEHIQQHPEEPLEGTTWTHSLK	14	1	0.00497658	1	0
TMEM251	NX_Q8N6I4	NSCLC_H522_P0001563_PP	comet	LALEHIQQHPEEPLEGTTWTHSLK	14	1	0.00497658	1	0
TMEM251	NX_Q8N6I4	PROSTATE_PC3_P003813_DP	comet	LALEHIQQHPEEPLEGTTWTHSLK	14	1	0.00497658	1	0
TMEM251	NX_Q8N6I4	PROSTATE_PC3_P003813_DP	tandem	LALEHIQQHPEEPLEGTTWTHSLK	14	1	0.100546	1	0
PCDH20	NX_Q8N6Y1	CNS_U251_P003815_DP	comet	SAGRPDPQSQLPER	13	1	0.0165702	1	0
PCDH20	NX_Q8N6Y1	CNS_U251_P003815_DP	tandem	SAGRPDPQSQLPER	13	1	0.0906522	1	0
DAND5	NX_Q8N907	CNS_SNB75_P001561_PP	comet	LQRGQDEVAAVTLPLNPQEVIQGMCK	19	1	0.0372013	1	0
TMEM75	NX_Q8N9X5	MELAN_MALME3M_P003199_PP	comet	SCHFALSFLIGKMGIIILSVCLICTR	8	1	0.0645086	1	0
CLEC1A	NX_Q8NC01	BREAST_BT549_P001357_PP	omssa	SRDCVAILNGMIFSK	12	1	0	1	1
ST6GALNAC3	NX_Q8NDV1	MELAN_M14_P003817_DP	comet	TVGIYPNAQIYVTTEKR	1	1	0.00087199	1	1
ST6GALNAC3	NX_Q8NDV1	MELAN_M14_P003817_DP	tandem	TVGIYPNAQIYVTTEKR	1	1	0.00222387	1	1
ZNF248	NX_Q8NDW4	COLON_COLO205_P003811_DP	omssa	IEQGEEPWILEK	10	1	0.00270186	1	0
ZNF248	NX_Q8NDW4	PROSTATE_PC3_P003813_DP	omssa	IEQGEEPWILEK	10	1	0.00270186	1	0
MDS2	NX_Q8NDY4	CNS_SF539_P003358_PP	comet	TETAGELSRGLIGVLSSQISWCLLNVNLSK	1	1	0.00461172	1	0
ARMC2	NX_Q8NEN0	BREAST_HS578T_P001355_PP	tandem	FISGNLGFLNEMISKGAVEILINLIK	6	1	0.112722	1	0
ARMC2	NX_Q8NEN0	COLON_COLO205_P001892_PP	mascot	GAVEILINLIK	6	1	0.00597872	1	0
ARMC2	NX_Q8NEN0	LEUK_CCRFCEM_P003197_PP	omssa	GAVEILINLIK	6	1	0.0319987	1	0
ARMC2	NX_Q8NEN0	MELAN_SKMEL5_P001570_PP	mascot	GAVEILINLIK	6	1	0.00597872	1	0
ARMC2	NX_Q8NEN0	NSCLC_EKVX_P001358_PP	mascot	GAVEILINLIK	6	1	0.00597872	1	0
ARMC2	NX_Q8NEN0	NSCLC_EKVX_P001358_PP	omssa	GAVEILINLIK	6	1	0.0319987	1	0
ARMC2	NX_Q8NEN0	OVAR_SKOV3_P001744_PP	mascot	GAVEILINLIK	6	1	0.00597872	1	0
ARMC2	NX_Q8NEN0	RENAL_A498_P003196_PP	omssa	GAVEILINLIK	6	1	0.0319987	1	0
ARMC2	NX_Q8NEN0	RENAL_RXF393_P001567_PP	mascot	GAVEILINLIK	6	1	0.00597872	1	0
ARMC2	NX_Q8NEN0	RENAL_RXF393_P001567_PP	omssa	GAVEILINLIK	6	1	0.0319987	1	0
ARMC2	NX_Q8NEN0	RENAL_UO31_P003201_PP	mascot	GAVEILINLIK	6	1	0.00597872	1	0
ANKK1	NX_Q8NFD2	MELAN_MALME3M_P003199_PP	comet	VAAGMRPSLQPVSDQWPSEAQQMVDLMKR	11	1	0.0569086	1	0
GPR156	NX_Q8NFN8	CNS_U251_P003815_DP	comet	NAVIESLQEQVNNAK	3	1	0.0895571	1	0
GPR156	NX_Q8NFN8	PROSTATE_PC3_P003813_DP	omssa	NAVIESLQEQVNNAK	3	1	0.00641328	1	0
OR8G5	NX_Q8NG78	LEUK_K562_P001356_PP	comet	QGITFLQKENNNTIHLNTMFFLSPAETHQR	11	1	0.0330353	1	0
OR9K2	NX_Q8NGE7	OVAR_OVCAR3_P001747_PP	comet	LNTPMYFFLGNLSFIDLFYSSVIEPK	12	1	0.0406197	1	0
OR9K2	NX_Q8NGE7	RENAL_UO31_P003201_PP	comet	LNTPMYFFLGNLSFIDLFYSSVIEPK	12	1	0.0406197	1	0
OR4C13	NX_Q8NGP0	BREAST_MDAMB231_P001389_PP	comet	MANRNNVTEFILLGLTENPK	11	1	0.0139075	1	0
OR4C13	NX_Q8NGP0	LEUK_CCRFCEM_P003197_PP	comet	MANRNNVTEFILLGLTENPK	11	1	0.0139075	1	0
OR4C13	NX_Q8NGP0	PROSTATE_DU145_P001745_PP	comet	MANRNNVTEFILLGLTENPK	11	1	0.0139075	1	0
OR4C13	NX_Q8NGP0	RENAL_A498_P003196_PP	comet	MANRNNVTEFILLGLTENPK	11	1	0.0139075	1	0
OR5M3	NX_Q8NGP4	MELAN_UACC62_P001891_PP	comet	VSPQLNNPMYFFLSHLSFVDVWFSSNVTPK	11	1	0.0716279	1	0
GPR150	NX_Q8NGU9	COLON_COLO205_P001892_PP	tandem	ALAALGWLLALLLALPPAFVVR	5	1	0.109205	1	1
GPR150	NX_Q8NGU9	NSCLC_EKVX_P001358_PP	tandem	ALAALGWLLALLLALPPAFVVR	5	1	0.109205	1	1
OR6N2	NX_Q8NGY6	BREAST_MCF7ADR_P001564_PP	tandem	TLAIVYSVLTPMVNPIIYSLR	1	1	0.0758407	1	0
OR51F2	NX_Q8NH61	COLON_COLO205_P001892_PP	comet	HSKSNHQLFLIR	11	1	0.0306848	1	0
OR51H1	NX_Q8NH63	NSCLC_EKVX_P001358_PP	comet	MTNLNASQANHRNFILTGIPGTPDK	11	1	0.0414281	1	0
OR51H1	NX_Q8NH63	NSCLC_H23_P003198_PP	comet	MTNLNASQANHRNFILTGIPGTPDK	11	1	0.0414281	1	0
OR51H1	NX_Q8NH63	PROSTATE_DU145_P001745_PP	comet	MTNLNASQANHRNFILTGIPGTPDK	11	1	0.0414281	1	0
OR2V1	NX_Q8NHB1	LEUK_CCRFCEM_P003197_PP	tandem	VASIFYTVLTPMLNPLIYSLRNGEVMGALR	5	1	0.0470048	1	0
AKR7L	NX_Q8NHP1	COLON_COLO205_P001892_PP	comet	GHTEIDTAFLYSDGQSETILGGLGLR	1	1	0.00054665	1	1
AKR7L	NX_Q8NHP1	COLON_COLO205_P003811_DP	comet	GHTEIDTAFLYSDGQSETILGGLGLR	1	1	0.00054665	1	1
AKR7L	NX_Q8NHP1	COLON_COLO205_P003811_DP	mascot	GHTEIDTAFLYSDGQSETILGGLGLR	1	1	0	1	1
AKR7L	NX_Q8NHP1	COLON_COLO205_P003811_DP	omssa	GHTEIDTAFLYSDGQSETILGGLGLR	1	1	0	1	1
ZNF461	NX_Q8TAF7	OVAR_OVCAR4_P001888_PP	comet	MAHELVMFRDVAIDVSQEEWECLNPAQR	19	1	0.0628383	1	1
STOML3	NX_Q8TAV4	CNS_U251_P001569_PP	omssa	ENFVGVNNKR	13	1	0	1	1
STOML3	NX_Q8TAV4	MELAN_M14_P001562_PP	omssa	ENFVGVNNKR	13	1	0	1	1
CNIH3	NX_Q8TBE1	MELAN_M14_P003817_DP	comet	SPIDQCNPVHAR	1	1	0.0363232	1	0
CNIH3	NX_Q8TBE1	MELAN_M14_P003817_DP	mascot	SPIDQCNPVHAR	1	1	0.0402109	1	0
CNIH3	NX_Q8TBE1	MELAN_M14_P003817_DP	tandem	SPIDQCNPVHAR	1	1	0.107639	1	0
CNIH3	NX_Q8TBE1	MELAN_MALME3M_P003199_PP	comet	SPIDQCNPVHAR	1	1	0.0363232	1	0
CNIH3	NX_Q8TBE1	MELAN_MALME3M_P003199_PP	mascot	SPIDQCNPVHAR	1	1	0.0402109	1	0
CNIH3	NX_Q8TBE1	MELAN_MALME3M_P003199_PP	omssa	SPIDQCNPVHAR	1	1	0.0159789	1	0
CNIH3	NX_Q8TBE1	NSCLC_HOP92_P003204_PP	omssa	SPIDQCNPVHAR	1	1	0.0159789	1	0
CNIH3	NX_Q8TBE1	NSCLC_HOP92_P003364_PP	omssa	SPIDQCNPVHAR	1	1	0.0159789	1	0
OR51E1	NX_Q8TCB6	MELAN_UACC257_P001897_PP	tandem	IGVAAVVRGAALMAPLPVFIK	11	1	0.0630838	1	0
MAGEE2	NX_Q8TD90	NSCLC_HOP62_P001359_PP	comet	ASAHLDQVFGLNLRVIDPQADTYNLVSK	X	1	0.0476018	1	0
KLF14	NX_Q8TD94	RENAL_ACHN_P003207_PP	tandem	IDPPLTSEVESSASGSGPGPAPSFTTCL	7	1	0.0614505	1	0
MCOLN3	NX_Q8TDD5	MELAN_M14_P003817_DP	mascot	ISLDNDISIR	1	1	0.00062073	1	0
C7orf33	NX_Q8WU49	LEUK_CCRFCEM_P003197_PP	comet	GMEFIAPVSAPTKSGAPWHFLSQGPTDAQR	7	1	0.0304543	1	0
C7orf33	NX_Q8WU49	MELAN_MALME3M_P003199_PP	comet	GMEFIAPVSAPTKSGAPWHFLSQGPTDAQR	7	1	0.0304543	1	0
C7orf33	NX_Q8WU49	RENAL_A498_P003196_PP	comet	GMEFIAPVSAPTKSGAPWHFLSQGPTDAQR	7	1	0.0304543	1	0
TSPEAR	NX_Q8WU66	CNS_SF268_P003376_PP	comet	LLGSFQLFQSFPTFGAADWEVFQIGER	21	1	0.061075	1	0
ZNF606	NX_Q8WXB4	NSCLC_A549_P001906_PP	tandem	DQLEMYHMNQSTAMRQMVFMQK	19	1	0.114295	1	1
ASB15	NX_Q8WXK1	LEUK_SR_P001750_PP	comet	KGSYDMVSTLIK	7	1	0.0476076	1	0
ASB15	NX_Q8WXK1	OVAR_SKOV3_P001744_PP	comet	KGSYDMVSTLIK	7	1	0.0476076	1	0
KCNN1	NX_Q92952	CNS_U251_P001569_PP	omssa	LYLLGRVMLLHSK	19	1	0.00402197	1	0
KCNN1	NX_Q92952	MELAN_MALME3M_P003199_PP	omssa	LYLLGRVMLLHSK	19	1	0.00402197	1	0
EMID1	NX_Q96A84	CNS_SF539_P003358_PP	mascot	VSELTERLK	22	1	0.0283958	1	1
EMID1	NX_Q96A84	COLON_COLO205_P003811_DP	mascot	VSELTERLK	22	1	0.0283958	1	1
EMID1	NX_Q96A84	NSCLC_H460_P003814_DP	mascot	VSELTERLK	22	1	0.0283958	1	1
TMEM125	NX_Q96AQ2	COLON_COLO205_P003811_DP	mascot	QAHHVALLR	1	1	0.0408298	1	0
ZNF775	NX_Q96BV0	COLON_COLO205_P003811_DP	omssa	AGLHELIQDAAARR	7	1	0.0128797	1	1
TM4SF18	NX_Q96CE8	CNS_U251_P003815_DP	tandem	TLDGWEYAFEGTAGR	3	1	0.121225	1	0
TM4SF18	NX_Q96CE8	RENAL_ACHN_P003207_PP	comet	TLDGWEYAFEGTAGR	3	1	0.0268296	1	0
TM4SF18	NX_Q96CE8	RENAL_ACHN_P003207_PP	mascot	TLDGWEYAFEGTAGR	3	1	0	1	0
TM4SF18	NX_Q96CE8	RENAL_ACHN_P003207_PP	omssa	TLDGWEYAFEGTAGR	3	1	0.026705	1	0
LRRIQ1	NX_Q96JM4	PROSTATE_PC3_P003813_DP	omssa	KLMILSTEYR	12	1	0	1	0
C12orf42	NX_Q96LP6	LEUK_HL60_P001904_PP	comet	SLHFLNFPVFPERTQNSMACK	12	1	0.064092	1	0
TECTB	NX_Q96PL2	CNS_U251_P003815_DP	omssa	SRGFSSLYSFSDVLHHLIMMLGICAVL	10	1	0.0158981	1	0
OR2A14	NX_Q96R47	MELAN_SKMEL2_P001749_PP	comet	AFSTCSSHLCVVGLFFGSAIVTYMAPKSR	7	1	0.082711	1	0
KCNA7	NX_Q96RP8	MELAN_LOXIMVI_P001390_PP	tandem	DGTGLAAAAAAGPFPAPLNGSSQMPGNPPR	19	1	0.0939369	1	0
GABRG3	NX_Q99928	MELAN_M14_P003817_DP	omssa	TTSLLHPDSSR	15	1	0.018454	1	0
TBL1Y	NX_Q9BQ87	BREAST_MCF7_P003818_DP	comet	GNYVLSAGVDKTTIIWDAHTGEAK	Y	1	0	1	1
ZNF577	NX_Q9BSK1	OVAR_OVCAR8_P003383_PP	tandem	LEQGEPPGIAEGAAHSQICPGFVIQSR	19	1	0.0165128	1	0
TMEM204	NX_Q9BSN7	NSCLC_H226_P001566_PP	omssa	EDCMAPRVIVISR	16	1	0	1	1
LRRC61	NX_Q9BV99	LEUK_RPMI8226_P003359_PP	tandem	MDPPAEKPGEAGGLQITPQLLK	7	1	0.0161774	1	0
TTLL2	NX_Q9BWV7	OVAR_OVCAR4_P001888_PP	comet	SWDVDDLLLWKK	6	1	0.0581188	1	1
TEX15	NX_Q9BXT5	NSCLC_EKVX_P001358_PP	tandem	SYAIICNNFWESCDLQGYSSVSQR	8	1	0.105287	1	0
SLC46A2	NX_Q9BY10	RENAL_TK10_P003203_PP	omssa	KISICMSLLGFLLSR	9	1	0.041563	1	0
ASXL3	NX_Q9C0F0	MELAN_M14_P003817_DP	comet	TAPERNVEIPPSSPNPDGK	18	1	0.0856088	1	1
PCDHAC1	NX_Q9H158	NSCLC_H226_P001566_PP	comet	ASLGLGSDNNSLLLR	5	1	0.0221256	1	0
PCDHAC1	NX_Q9H158	NSCLC_H226_P001566_PP	omssa	ASLGLGSDNNSLLLR	5	1	0	1	0
PCDHAC1	NX_Q9H158	RENAL_A498_P003196_PP	omssa	ASLGLGSDNNSLLLR	5	1	0	1	0
PCDHAC1	NX_Q9H158	RENAL_ACHN_P003207_PP	omssa	ASLGLGSDNNSLLLR	5	1	0	1	0
PCDHAC1	NX_Q9H158	RENAL_UO31_P003201_PP	omssa	ASLGLGSDNNSLLLR	5	1	0	1	0
NEUROG2	NX_Q9H2A3	BREAST_T47D_P001386_PP	comet	FAHNYIWALTETLR	4	1	0.0168111	1	0
NEUROG2	NX_Q9H2A3	MELAN_SKMEL28_P001360_PP	comet	FAHNYIWALTETLR	4	1	0.0168111	1	0
C7orf69	NX_Q9H7B7	MELAN_LOXIMVI_P001390_PP	omssa	MGFHFCIWIIFLLPPPCK	7	1	0.0415595	1	0
-	NX_Q9N2K0	COLON_HCT15_P003208_PP	comet	QMFLLTSPQYHPLPQDLPSA	2	1	0.0758272	1	0
KLHL1	NX_Q9NR64	PROSTATE_DU145_P001745_PP	tandem	HGLGVTVLEGPIYAVGGHDGWSYLNTVER	13	1	0.0248622	1	0
GPR173	NX_Q9NS66	CNS_SF268_P003376_PP	tandem	MANTTGEPEEVSGALSPPSASAYVK	X	1	0.0361355	1	0
PKDREJ	NX_Q9NTG1	OVAR_OVCAR3_P001747_PP	comet	FSLFLNCTNCASR	22	1	0.086826	1	0
VNN3	NX_Q9NY84	NSCLC_H23_P003198_PP	tandem	AMGVNLLAANTHNTSMHMTGSGIYAPEAVK	6	1	0.0153503	1	1
TRPM5	NX_Q9NZQ8	LEUK_SR_P001388_PP	mascot	VVAVGMASLGR	11	1	0.0405094	1	0
TRPM5	NX_Q9NZQ8	NSCLC_HOP92_P003204_PP	mascot	VVAVGMASLGR	11	1	0.0405094	1	0
ZSWIM5	NX_Q9P217	MELAN_SKMEL2_P001749_PP	omssa	QLWDELGALWVCIILNPHCK	1	1	0.00649534	1	1
ZSWIM5	NX_Q9P217	NSCLC_HOP92_P003204_PP	omssa	QLWDELGALWVCIILNPHCK	1	1	0.00649534	1	1
UNC79	NX_Q9P2D8	COLON_COLO205_P003811_DP	mascot	AGLLLDTIK	14	1	0.0179852	1	0
DISP3	NX_Q9P2K9	OVAR_OVCAR3_P001747_PP	omssa	GHLIVQLQELLHHWVLWSAVK	1	1	0.0520988	1	1
ERVK-18	NX_Q9QC07	CNS_SNB75_P001561_PP	omssa	TFTLYLDQIATLIGPTR	1	1	0.00765068	1	0
ERVK-18	NX_Q9QC07	MELAN_UACC62_P001891_PP	omssa	TFTLYLDQIATLIGPTR	1	1	0.00765068	1	0
GALP	NX_Q9UBC7	MELAN_M14_P003817_DP	comet	RNVMETFAKPEIGDLGMLSMK	19	1	0.0857942	1	0
KIAA1024	NX_Q9UPX6	NSCLC_EKVX_P001358_PP	comet	DKSINCTSGQLSSDTSSVGTQTEHVLEPK	15	1	0.042812	1	1
PPIAL4A	NX_Q9Y536	COLON_COLO205_P003811_DP	omssa	HNGTGDKSIYGEK	1	1	0.00018002	0	1
PPIAL4A	NX_Q9Y536	MELAN_M14_P003817_DP	tandem	HNGTGDKSIYGEK	1	1	0.00021772	0	1
ASB4	NX_Q9Y574	COLON_COLO205_P003811_DP	mascot	AIPLLSLPLSLK	7	1	0.0397271	1	0
ASB4	NX_Q9Y574	COLON_COLO205_P003811_DP	tandem	AIPLLSLPLSLK	7	1	0.125908	1	0
PCDHB7	NX_Q9Y5E2	BREAST_BT549_P001357_PP	comet	EEIPEFSLTLTALDGGSPPR	5	1	0.00147565	1	0
PCDHB1	NX_Q9Y5F3	OVAR_OVCAR5_P003363_PP	tandem	FMPNFPFPHATGEIKMEAGSSLPPNSDR	5	1	0.0347126	1	0
PCDHGA2	NX_Q9Y5H1	NSCLC_H460_P003814_DP	omssa	LTIYSVEVEITDINDNAPR	5	1	0.00172473	1	0
CSAG2,CSAG3	NX_Q9Y5P2	BREAST_MCF7ADR_P001564_PP	omssa	KPRASSPLSNNHPPTPK	X	1	0.0310168	1	0
CSAG2,CSAG3	NX_Q9Y5P2	CNS_SNB19_P001899_PP	omssa	KPRASSPLSNNHPPTPK	X	1	0.0310168	1	0
CSAG2,CSAG3	NX_Q9Y5P2	LEUK_K562_P001356_PP	omssa	KPRASSPLSNNHPPTPK	X	1	0.0310168	1	0
CSAG2,CSAG3	NX_Q9Y5P2	MELAN_SKMEL2_P001749_PP	omssa	KPRASSPLSNNHPPTPK	X	1	0.0310168	1	0
CSAG2,CSAG3	NX_Q9Y5P2	MELAN_UACC257_P001897_PP	omssa	KPRASSPLSNNHPPTPK	X	1	0.0310168	1	0
CSAG2,CSAG3	NX_Q9Y5P2	NSCLC_H322M_P003206_PP	comet	KPRASSPLSNNHPPTPK	X	1	0.0736416	1	0
CSAG2,CSAG3	NX_Q9Y5P2	PROSTATE_PC3_P003487_PP	omssa	KPRASSPLSNNHPPTPK	X	1	0.0310168	1	0
